# Supplementary material for: Healthy Beyond Pregnancy, a Web-Based Intervention to Improve Adherence to Postpartum Care: Randomized Controlled Feasibility Trial
Source: PubMed Central journal article supplement (PMC5654734; doi:10.2196/humanfactors.7964), 2017-10-10
Supplement: humanfactors_v4i4e26_app1.pdf [file humanfactors_v4i4e26_app1.pdf]

|                       |                                                                                                                                                                                                                                                                                                                                                                                                                                                                                                                                                              |
|-----------------------|--------------------------------------------------------------------------------------------------------------------------------------------------------------------------------------------------------------------------------------------------------------------------------------------------------------------------------------------------------------------------------------------------------------------------------------------------------------------------------------------------------------------------------------------------------------|
| Postpartum Concern    | Sample Text Messages                                                                                                                                                                                                                                                                                                                                                                                                                                                                                                                                         |
| Birth Control         | <ul style="list-style-type: none"> <li>Planned pregnancies are healthy ones. Space pregnancies one year apart.</li> <li>Intrauterine devices (IUD) and birth control implants work well and last for 3-10 years. They are easy to use and can be removed at anytime.</li> <li>7/10 women like you are still using an IUD two years after getting one!</li> </ul>                                                                                                                                                                                             |
| Breastfeeding Support | <ul style="list-style-type: none"> <li>Congratulations on your decision to breastfeed! If you are having trouble reach out to our breastfeeding experts: (412) XXX-XXXX</li> <li>4 out of 5 women breastfeed after leaving the hospital- you can do it!</li> <li>Breast milk helps your baby fight off infection and lowers your baby's risk of having asthma or allergies. Give your baby the best start!</li> <li>Breastfeeding is not just for baby. It decreases your risk of diabetes, heart disease, and help women lose weight postpartum.</li> </ul> |
| Postpartum Mood       | <ul style="list-style-type: none"> <li>Most new moms feel mood swings and can be weepy during the first 2-3 weeks after delivery. If it doesn't get better or gets worse call your doctor.</li> <li>Are you feeling angry or sad? Do you lack interest in your baby or feel hopeless? These can be signs of postpartum depression.</li> <li>About 1 in 10 women get postpartum depression—if you have concerns</li> </ul>                                                                                                                                    |

| Outcome                          | Usual Care<br>(n=15) | Healthy<br>Beyond<br>Pregnancy<br>(n=14) | OR (95% CI)     | p value |
|----------------------------------|----------------------|------------------------------------------|-----------------|---------|
| <b>Attended Postpartum Visit</b> | 8 (53.3)             | 12 (85.7)                                | 5.3 (0.9, 32.0) | 0.06    |
| <b>LARC</b>                      | 4 (26.6)             | 3 (21.4)                                 | 0.8 (0.2, 4.2)  | 0.74    |
| <b>Any Contraception</b>         | 11 (73.3)            | 11 (78.5)                                | 1.3 (0.3, 7.7)  | 0.73    |
